# Supplementary material for: Mitotic Spindle Attachment to the Holocentric Chromosomes of Cuscuta europaea Does Not Correlate With the Distribution of CENH3 Chromatin
Source: PubMed Central journal article supplement (PMC6992598; doi:10.3389/fpls.2019.01799), 2020-01-24
Supplement: DataSheet_1.pdf [file DataSheet_1.pdf]

>CUS-TR2 (synthesized oligonucleotide probe labeled at 5' end with biotin)  
CCTGAGTAAAAGACGTATATCTTTGTTTCTATTAATAATTTGGACTTGAGTCC

>CUS-TR25 (synthesized oligonucleotide probe labeled at 5' end with biotin)  
ACTTAAATACTAAATGAAGTTACGTATTACACAAAACAAAACCCCGTTGACTTCAAAAC

>CUS-TR24 (synthesized oligonucleotide probe labeled at 5' end with FITC)  
AGTGTCACAAATACTTAGCCTTATCTCTATGATTTAGCGTTTTTCAGCGAA

>CUS-TR65 (it was amplified from *C. europaea* genomic DNA using PCR with primers TCAAACCTTAAGATAAATGGTATTTG and GGCCTTTGCAAAAATATACA)  
AACTACTATTTTTCTTCACTGCTTTTAAATGTAAAATTTTAAAAAGGTAAACATAATAAAA  
GCTTAACTGGAAAATAACCTCATGATTTGCAAGAAACGAAGTATGATCCGTGTTTGAAAA  
AATAAAAACCAAACCTTGGTCAAATAAATATGAGTGAATTTTCAGAGACTAGTAAATAGTT  
GTTTCAGTAATTAAGAAGAAATCTCTAGGCTCTTAACCCAATAAATTCAACCAAATACCA  
TTTATCTTAAGGTTTGA

>CUS-TR66 (it was amplified from *C. europaea* genomic DNA using PCR with primers ACTATGCAATTTTCAAAGCG and GAGCTTCAAGTACCACATTTCA)  
AGCTTCAAGTACCACATTTTCATCCCCTCGGAAATTTAAATTACACTAAATGCATCAACAT  
AAAAGAGTATAAAGCACGTGTAACCACAAGAGATTATTATAAAGCACTACCCAATTTTA  
GAGATGTTGAAACATGTATATGTACATCCAGCTAACAAAGTTAACACATTAATAAAGTTAAA  
GTAAAAGAAGCTAAGCATAACATAGACCATATTCAGTCATGTCTGGATAAAAAGAGAATG  
GATGTAGTATAAATTAAGTGTATAGTTCTTTTAAATTTTCTATAAACTTATCGACTATGC  
ATGTTCACTAATAACATCAAAATCCATAAAATTTGAAGCTAAATTGACACATATTTAAT  
ATCAAGTATGATTGGATCTTGTATTTGCTTTTATCACATTTTATACATTAATCACTAAAG  
TGACTTAAAGCTTTATTAATAAACATGGGTTATTAAGTTAATCTAGCCTATTTTCTGGCT  
ATGAAGCCATTTCTTCTAATGTTATTTAATATTAATTTAAATACTTTAAAATAACCAT  
AGGAAAATTAAGTAATGGATAAGATATTAAGACACTTTTTCAAGCCTAACCTGCCTAG  
GCTTTAAAGACTTGTACGTTTTACGTCTTTTAGAACATTAATTGACTTGAATAATCAA  
CGTACTACTAGAGAATGAGCTTTTACGTGGTTATTTTACATTTTACGTCGGTTTTG  
TATGTGACGTGTAAGTGAAGACGTTATCGATATAAACATTTTACGTGGTTCTAAAACC  
GACGTGAAAGGTGATTTTTGAAAGAAAAAATTAATATACCATGTCGGTTCTTATACAA  
AACCGACGTCAAAAGTGTATTTTCGAAAAATAAAATAAATCTCTCACGTACGTTCTTACA  
AACACCGACGTCAAAAGTATTTTTAATATATATACCACGTGCTTTTCGTTCAATAACCG  
TCGTGATAAGTCCATATTTTAAACAAATATGTGTATTATGTAGTAATATATGCATACAC  
GCTTTTGAAAATTGCATAGT

>CUS-TR67 (it was amplified from *C. europaea* genomic DNA using PCR with primers CACCATCCCATGCTAGAGA and GAGTGAAGTGCATTTTTTGAAGT)  
CACCATCCCATGCTAGAGAGTAGTATTTGACATTGTTTTGGATTTCTATGATGAATATAA  
TACACAAAATTAAGGAAGTCAATGTGATGTAATGAAAAGTATTGTTTTGAACTTGGGTTG  
TTAATTTTTAATGTTTTAATCTGCTTTAGTATCTATTAGATTGAGTTGAAGTTATCAT  
TTTCAACTATGCTTTTCACTTCTCAGAATAAGAACTTTGAGCTTGGGTTGTTTATTTTT  
AAAGTTTGAATAACATTTGAAAAATTCCTTTAAGCTTTTCATTAGATAGAAGTACTACT  
TCAAAAAATGCAGTTCACTC

>TAAn (synthesized oligonucleotide probe labeled at 5' end with biotin)  
TAATAATAATAATAATAATAATAATAATAATAATAATAATAATAATAATA

>45SrDNA (clone\_ID1646; fragment of 45S rDNA amplified using PCR from genomic DNA of *Pisum sativum*)  
CTAAACCCAGCTCACGTTCCCTATTGGTGGGTGAACAATCCAACACTTGGTGAATTCTGC  
TTCACAAATGATAGGAAGAGCCGACATCGAAGGATCAAAAAGCAACGTCGCTATGAACGCT  
TGGCTGCCACAAGCCAGTTATCCCTGTGGTAACTTTTCTGACACCTCTAGCTTCAAATTC  
CGAAGGTCTAAAGGATCGATAGGCCACGCTTTCACGTTTCGATTTCTGACTGGAAATCAG  
AATCAAACGAGCTTTTACCCTTTTGTCCACACGAGATTTCTGTTCTCGTTGAGCTCATC  
TTAGGACACTTGCCTTATCTTTTAAACAGATGTGCCGCCAGCCAAACTCCCCACCTGAC  
AATGTCTTCCGCCGGATCGACCAACAAAGTCAAGCTTGGATCCAAAAAGAGGGGCAGC  
GCCCCGCTCCGATTCACGGAATAAGTAAAATAACGTTAAAAGTAGTGGTATTTCACTTT  
CGCTGTTTCCAGCTCCCACTTATCCTACACCTCTCAAGTCATTTACAAAAGTCGGACTAG  
AGTCAAGCTCAACAGGGTCTTCTTTCCCGCTGATTCGCCAAGCCCGTTCCCTTGGCTG  
TGGTTTCGCTGGATAGTAGACAGGGACAGTGGGAATCTCGTTAATCCATTCATGCGCGTC  
ACTAATTAGATGACGAGGCATTTGGCTACCTTAAGAGAGTCATAGTTACTCCCGCGTTT

ACCCGCGCTTGGTTGAATTTCTTCACTTTGACATTGACAGCACTGGGCAGAAATCACATT  
GCGTCAACATCCGCAGGGACCATCGCAATGCTTTGTTTTAATTAACAGTCGGATTCCCC  
TTGTCGTACCAGTTCTGAGTTGACTGTTTCGATGCCCGGGGAAGAGGCCCGAAAGGCC  
GTTCCAATCCGTCCTCCCGACCGGGCACGGGACCCGCTCTCGCCGCGGGAGCAGCTCA  
AGCAGTCCACCAACAGCCGAGGTTTCGAACTGGGACCCCGTGCCAGCCCTCAGAGC  
CAATCTTTTTCCCGAGGTTACGGATCCATTTTGGCGACTTCCCTTGCTACATTGTTCCA  
TCGACCAGAGGCTGTTACCTTGGAGACCTGATGCGGTTATGAGTACGACCGGGCATGGA  
AGGCACTCGGTCTCCGGATTTTCAAGGGCCGCCAGGGGCGCACCGGACACCACGCGACG  
TGGGTGCTCTTCCAGCCGCTGGACCCTACCTCCGGCTGAGCCGTTTCCAGGGTGGGCAG  
GCTGTTAAACAGAAAAGATAACTCTTCCGGGGCCCCGCCAACGTCTCCGGACTCCCTA  
ACGTTGCCGTGAGCCACCAGTCCCGGTTTCAGGAATTTAACCAGATTCCCTTTCCGGTGT  
ACGCGCTTAGAGCGCTATCAGACGGGCTTCCCCCGTCCCTTAGGATCGACTAACCCATGT  
GCAAGTGCCGTTACATGGAACCTTCCCTCTTCGGCCTTCAAAGTTCTCATTTGAATA  
TTTGCTACTACCAAGATCTGCACCGACGACCGCTCCGCCAGGCTCGCGCCCTGGGT  
TTTGCAGCGACCGCCGCGCCCTCTACTCATCAGGGCTTGGCCCTTGCCCCAACGGCCGG  
GTATAGGTCGCGCGCTTAGCGCCATCCATTTCCGGGGCTAGTTGATTTCGGCAGGTGAGT  
TGTTACACACTCCTTAGCGGATTTGACTTCCATGACCACCGTCTGCTGTCTTAATCGA  
CCAACACCTTTGTGGGGTCTAGGTTAGCGCGCAGTTGGGCACCGTAACCCAGCTTCCGG  
TTCATCCCGCATCGCCAGTTCTGCTTACAAAAATGGCCCACTTGGAGCTCTCGATTCCA  
TGGCATGGTCAACAGAGCAGCCACACCGTCTACCTATTTAAAGTTTGAGAATAGGTGCG  
AGGGCGTTGCGCCCCGATGCTCTAATCATTGGCTTTACCCGATAGAACTCGCCCTCGG  
GCTCCAGCTATCTGAGGAACTTCGGAGGAAACAGCTACTAGACGGTTCGATTAGTC  
TTTCGCCCTATACCAAGTCAGACGAACTTTCGACGTCAGTATCGTTCGCGGCCCTCC  
ACCAGATTTCTCTGGCTTCGCCCGCTCAGGCATAGTTCACCATCTTTCCGGTCCCGA  
CAGGTATGCTCTACTCGAACCTTACAAAAAGATCAGGGTCGGTCGGCGGTGCAACCCA  
CAAGAGGATCCCACCAATCAGCTTCTTGCCTTACGGGTTTACTCGCCCGTTGACTCG  
CACACATGTCAGACTCCTTGGTCCGTGTTTCAAGACGGGTCGAATGGGGAGCCACAGGC  
CGACGCCAGGAGCACGAAGTGCCGAAGCACGCCGAATCAGCGCGCGCTGCCGTCCACAA  
TCGTGATGATGACGCTCCCGGAGCATTCAACAACCCAGGCTTGGGCCACCATCACAAT  
CCGCGTCGGTCAATGCTCGAGTCTATTGGCGGACCGGCACAAACCGTTCCACATCCGAC  
CGAGACACATCGCCGGCCCCATCCGCTTCCCTCCCGACAATTTCAAGCACTCTTTGACT  
CTCTTTTCAAAGTCTTTTCTCTTTCCCTCGCGGTAATTTGTTGCTATCGGTCTCTCGC  
CAATATTTAGCCTTGGACGGAATTTACCGCCCGATTGGGGCTGCATTCCCAAACAACCCG  
ACTCGCCGACAGCGCTCGTGGTGCAGACAGGGTCCGAGCACAACGGGGCTCTCACCTCT  
CCGGCGCCCCCTTCCAGGGGACTTGGGCCCGGTCCGCCGCTGAGGACGCTTCTCCAGACT  
ACAATTGCAACGCCGAGGGCGATCGATTCTCATGGTGGGCTTATCCCGGTTGCTCGCCG  
TACTAAGGGAATCCTTGTAGTTCTTTTCTCCGCTTATTGATATGCTTAAATTCAGC  
GGGTAGCCCCGCTGACCTGAGGTCTCATCAGGAGCGTTTAGAAACGCAAATGGGTAAA  
GAGCCAAATTCATAGAGCAACACATGATTGGTCTCGTGGGTACACAACCACCATTTA  
TCATGGCACACCTACCAAGTCTCAATTTTCAACCAACCATGAGACGAAAGAGAGCTCA  
CGGGAGGCAACATCCACCCTGCACAATACCTGTCAAAGGAAATTTGGCAGGAGGCTTCA  
ATATGTGACACCCAGGCAGCTGCCCTCAACCTAATGGCATCGGGCGCAACTTGCCTTC  
AAAGACTCGATGGTTCACGGGATTCTGCAATTCACACCAAGTATCGCATTTTCGCTACGTT  
CTTCATCGATGCAAGAGCCTAGATATCCGTTGCCGAGAGTCATTTTATATTAATGTGTCA  
AAACACAACCCGCACGGGAACCGTCTCCGGTGCCATGCAGATGTGCCAGAGCAAAGTTA  
AATTTCTTGACGCATTCAGCGTCGGGGTTTGGTGGTGGCACAGAGGAGAACGCATTTT  
GTCGTTCCCTCCGATGCCAATGGCAAGCTGGGGTGTGAAACACCTCAAGCCACCGCAT  
GTGTTCAAACCTAATTCAGTGTGGACTGCATATAAGGCATCGACAATGATCCTTCCGCA  
GGTTCACCTACGAAACCTTGTACGACTTCTCTTCTCTAATGATAAGGTTCAAGTGG  
ACTTCTACAACGTGCGGGCAGCGAACCGCCACGTGCGCCGAATCCGAACACTTCACC  
GGACCATTCAATCGGTAGGAGCGACGGGCGGTGTGTACAAAGGGCAGGGACGTAGTCAAC  
GCGAGCTGATGACTCGCGCTTACTAGGAATTCCTCGTTGAAGACCAACAATTGCAATGAT  
CTATCCCCATCAGATGAAATTTCAAAGATTACCCGGGCTGTGCGCCAAGGCTATAGAC  
TCGTTGAATACATCAGTGTAGCGCGCGTGGCGCCAGAATCTAAGGGCATCACAGACC  
TGTTATTGCCCTCAAACCTCCGTGGCTAAGCGCCATAGTCCCTCTAAGAAGCTGGCCGT  
GGAGGGTTACCTCCACATAGCTATTTAGCAGGCTGAGGTCTCGTTTCCGTTAACGGAATTA  
CCAGACAAATCGTCCACCAACTAAGAACGGCCATGCACCACCACCCATAGAATCAAGAA  
AGAGCTCTCAGTGTCAACTTACTATGTCTGGACTGGTAAGTTTCCCGTGTGGAG  
TCAAATTAAGCCGAGCTCCACTCTGGTGGTGGCTTCCGTCATTTCTTTAAGTTTC  
AGCCTTGCAGCCATACTCCCCCGGAACCCAAAGACTTTGATTTCTCATAAGGTGCCAGC  
GGAGTCTAAAAGCAACATCCGCTGATCCCTGGTTCGGCATCGTTTATGGTTGAGACTAGG  
ACGGTATCTGATCGTCTTCGAGCCCCAACCTTTCGTTCTTGATTAATGAAAACATCCTTG  
GCAAATGCTTTGCGAGTTGTTGCTTTTCATAAATCCAAGAATTTACCTCTGACTATGA  
AATACGAATGCCCGGACTGTCCCTGTTAATCATTACTCCGATCCCGAAGGCCAACACAA

TAGGATCAGAATCCTGTGGTGTATCCCATGCTAATGTATCCAGAGCGTAGGCTTGCTTT  
GAGCACTCTAATTTCTTCAAAGTAACAGCGCCGGAGGCACGACCCAGCCAATTAAGGCCA  
GGAGCGCATCGCCGGCAGAAGGGACGAGCCAACCGGTGCACACCAGAGGCGGACCGATCA  
ACCCAACCCAAGGTCCAACACTACGAGCTTTTTAACTGCAACAACCTAAATATACGCTATTG  
GAGCTGGAATTACCGCGGCTGCTGGCACCAGACTTGCCCTCCAATGGATCCTCGTTAAGG  
GATTTAGATTGTACTCATTCCAATTACCAGACTCAATGAGCCCGGTATTGTTATTTATTG  
TCACTACCTCCCCGTGTTAGGATTGGGTAATTTGCGCGCCTGCTGCCTTCCTTGGATGTG  
GTAGCCGTTTCTCAGGCTCCCTCTCCGGAATCGAACCCTAATTCTCCGTCACCCGTACC  
ACCATGGTAGGCCACTATCTACCATCGAAAGTTGATAGGGCAGAAATTTGAATGATGCG  
TCGCCAGCACAAAGGCCGTGCGATCCGACGAGTTATCATG

>5SrDNA (clone\_ID1761; fragment of 5S rDNA amplified using PCR from genomic DNA  
of *Pisum sativum*)

GCGATCATACCAGCACTAATGCACCGGAACCCATCAGAACTCCGCAGTTAAGCGTGCTTG  
GGCGAGAGTAGTACTAGGATGGGTGACCTCCTGGGAAGTCCTTGTGTTGCACCTCTTGTT  
TTGGGATTTTTTAAATACTTGTATCTATTTTTGTTAATCGTCGTAAGAATGGAAAGAA  
GTAGGAGAAAACAAATATTTTCAGCGTTAATTATGTCTGTTCTGCCGTTAATAAGTGA
